# Supplementary material for: Synthesis of a Non-Symmetrical Disorazole C1-Analogue and Its Biological Activity
Source: MDPI journal article supplement (doi:10.3390/molecules29051123), 2024-03-01

## Table of Contents

|                                                                                 |          |
|---------------------------------------------------------------------------------|----------|
| <b><math>^1\text{H}</math> and <math>^{13}\text{C}</math> NMR spectra .....</b> | <b>2</b> |
|---------------------------------------------------------------------------------|----------|

# <sup>1</sup>H and <sup>13</sup>C NMR spectra

<sup>1</sup>H NMR (400 MHz, CD<sub>3</sub>OD)

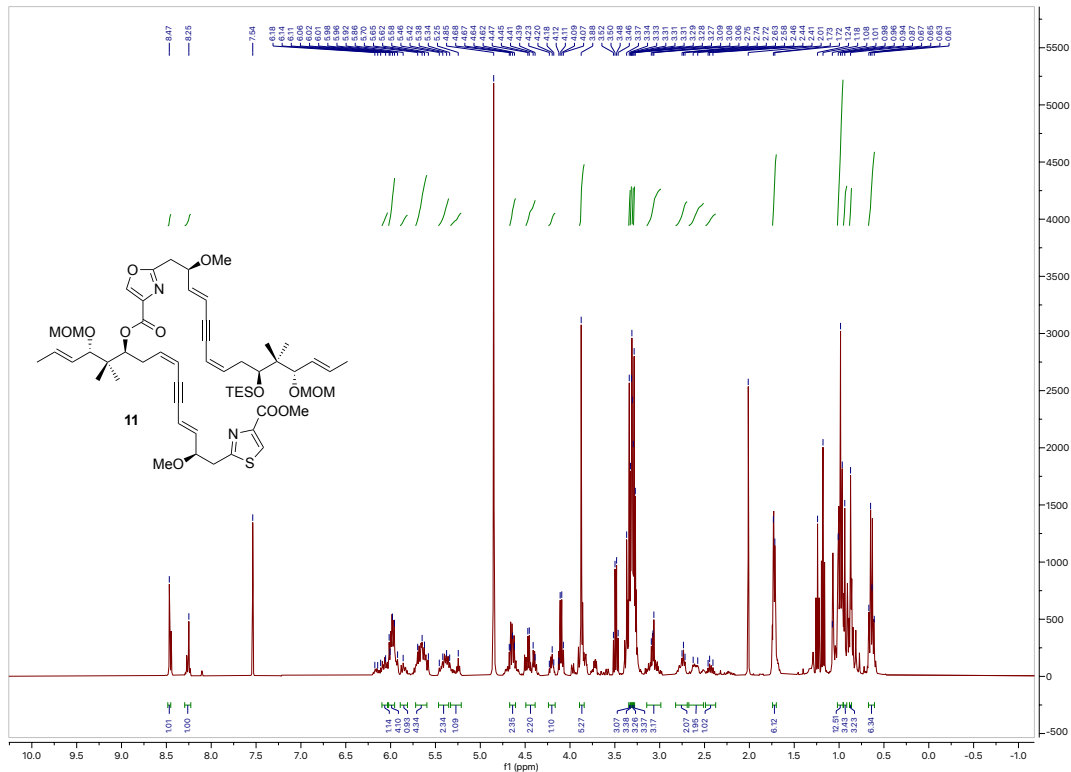

<sup>13</sup>C NMR (101 MHz, CD<sub>3</sub>OD)

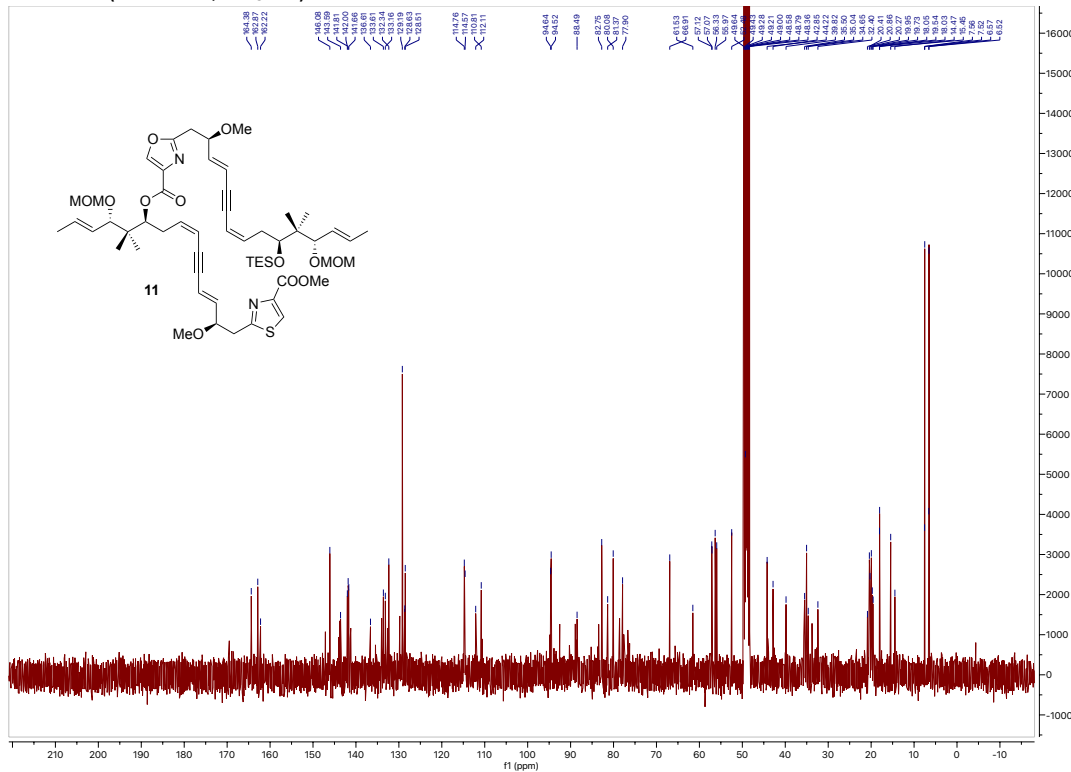

<sup>1</sup>H NMR (400 MHz, CDCl<sub>3</sub>)

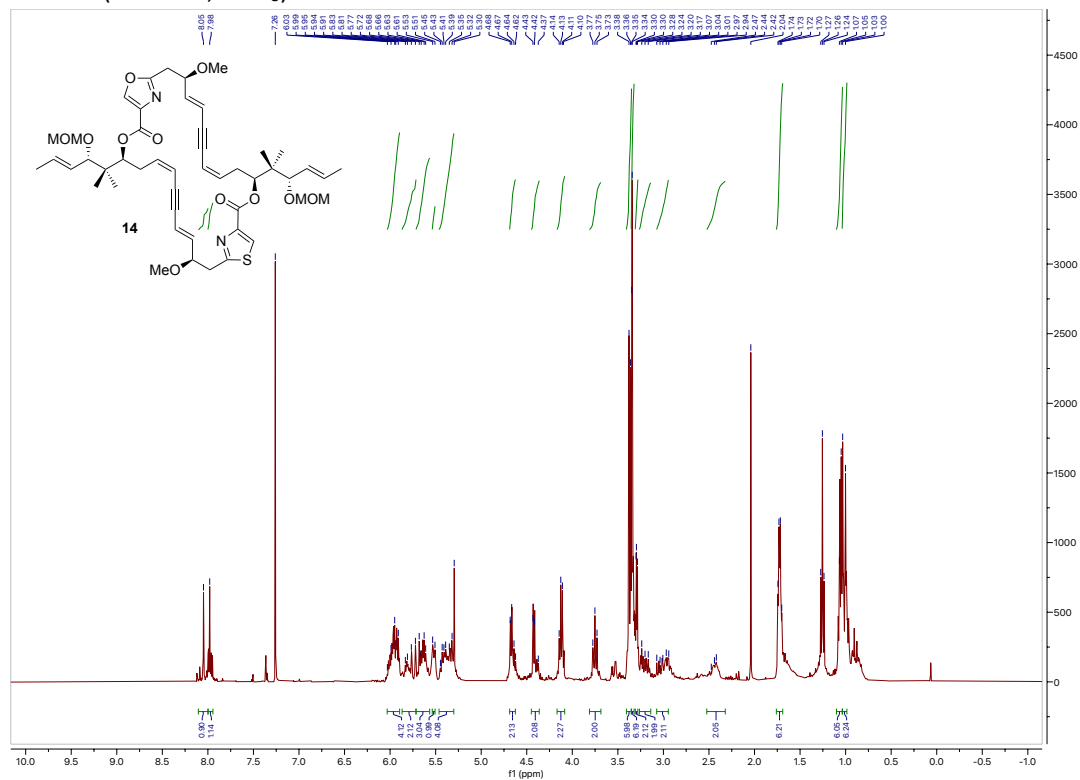

<sup>13</sup>C NMR (101 MHz, CDCl<sub>3</sub>)

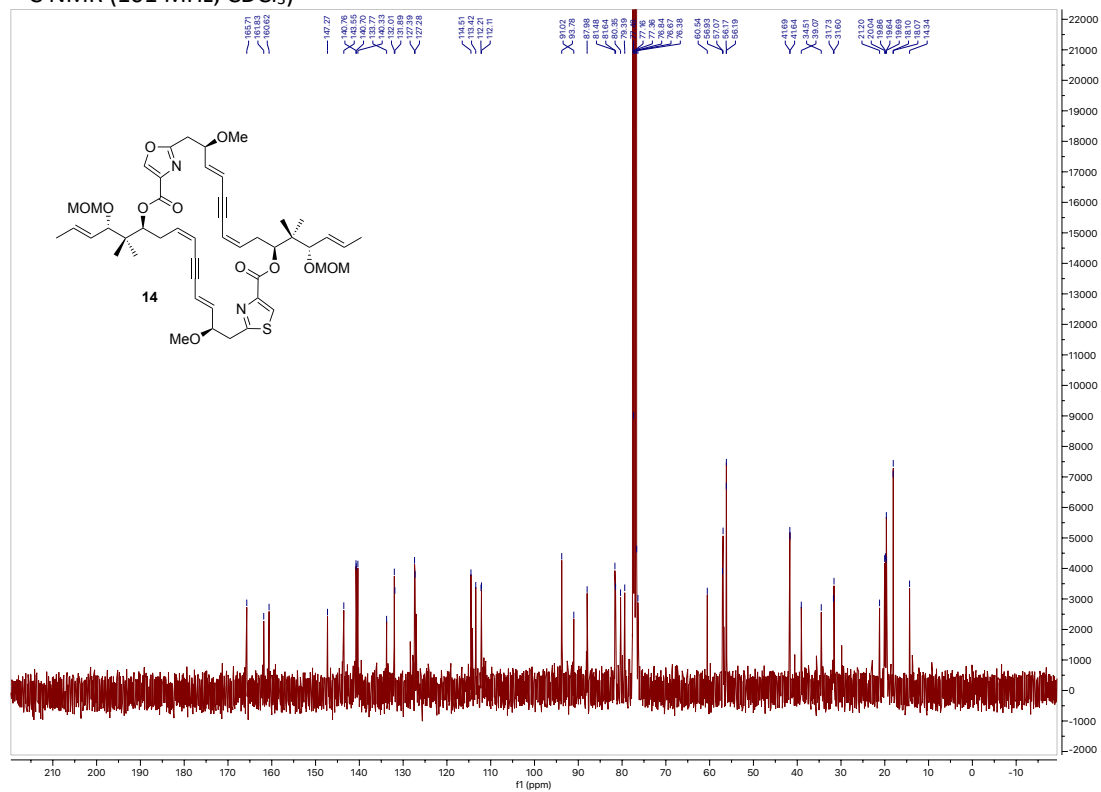

<sup>1</sup>H NMR (600 MHz, CDCl<sub>3</sub>)

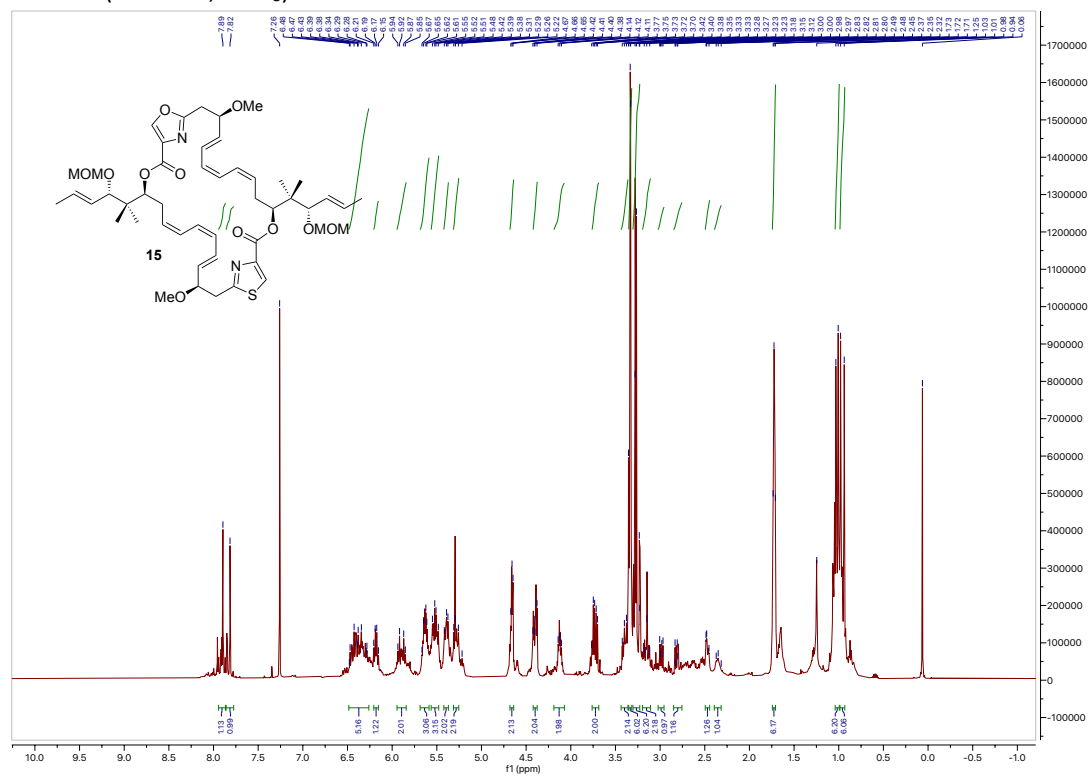

<sup>13</sup>C NMR (151 MHz, CDCl<sub>3</sub>)

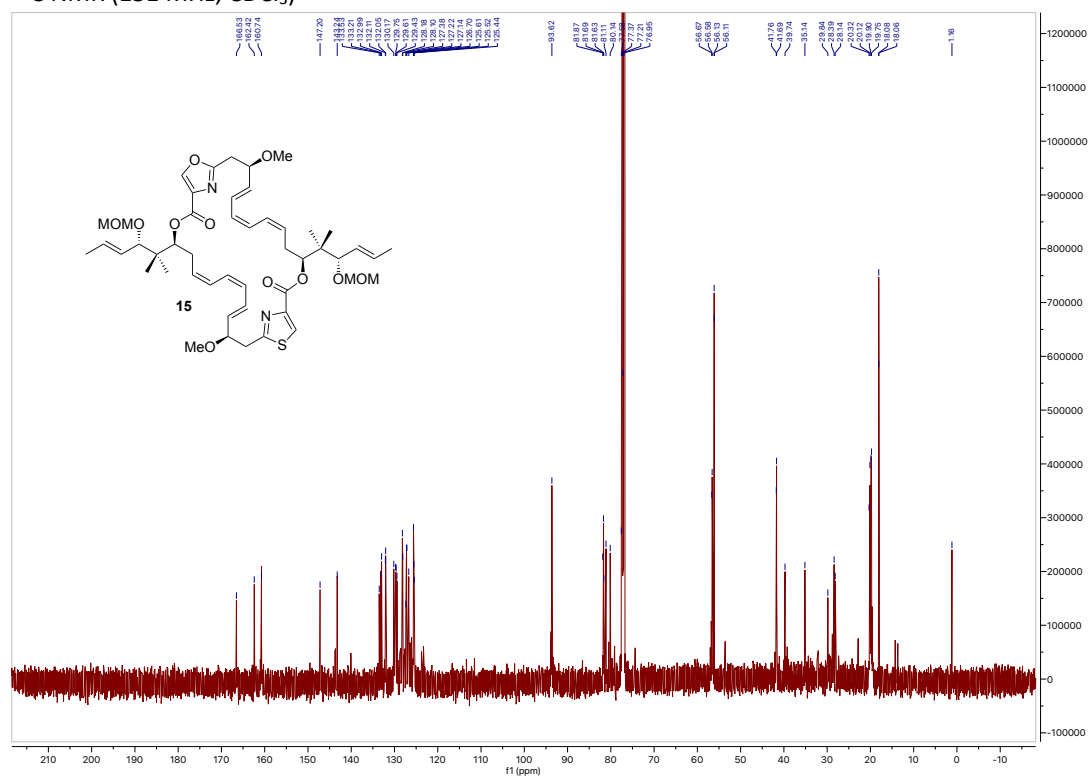

<sup>1</sup>H NMR (600 MHz, CD<sub>3</sub>OD)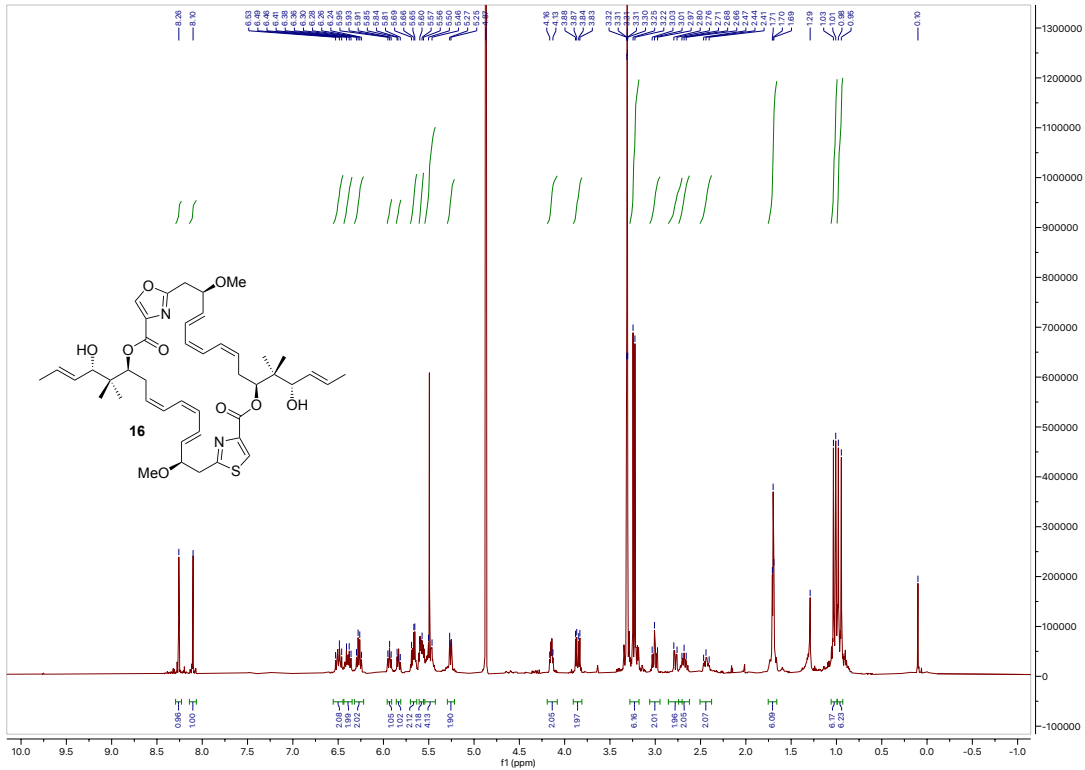<sup>13</sup>C NMR (151 MHz, CD<sub>3</sub>OD)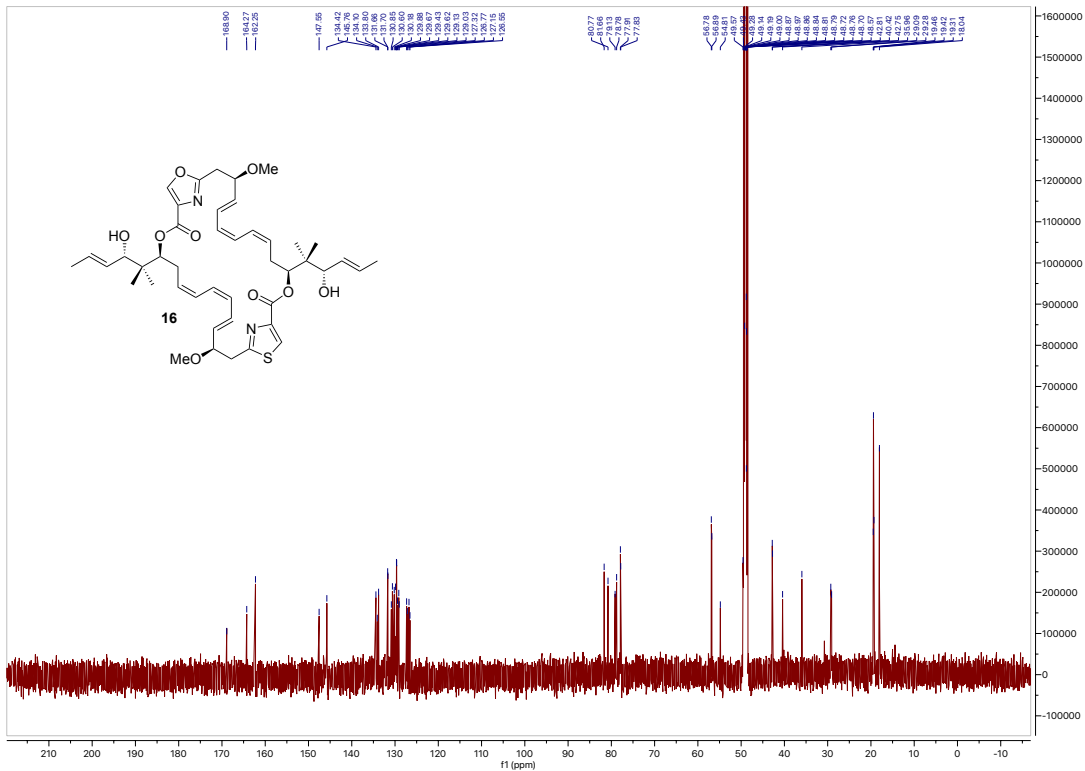

Supplement: s1 [file s1]
